# Supplementary material
Source: PubMed Central journal article supplement (PMC9012862)
Supplement: 41598_2022_9790_MOESM1_ESM.pdf [file 41598_2022_9790_MOESM1_ESM.pdf]

# Supplementary Materials

## Supplementary Figures

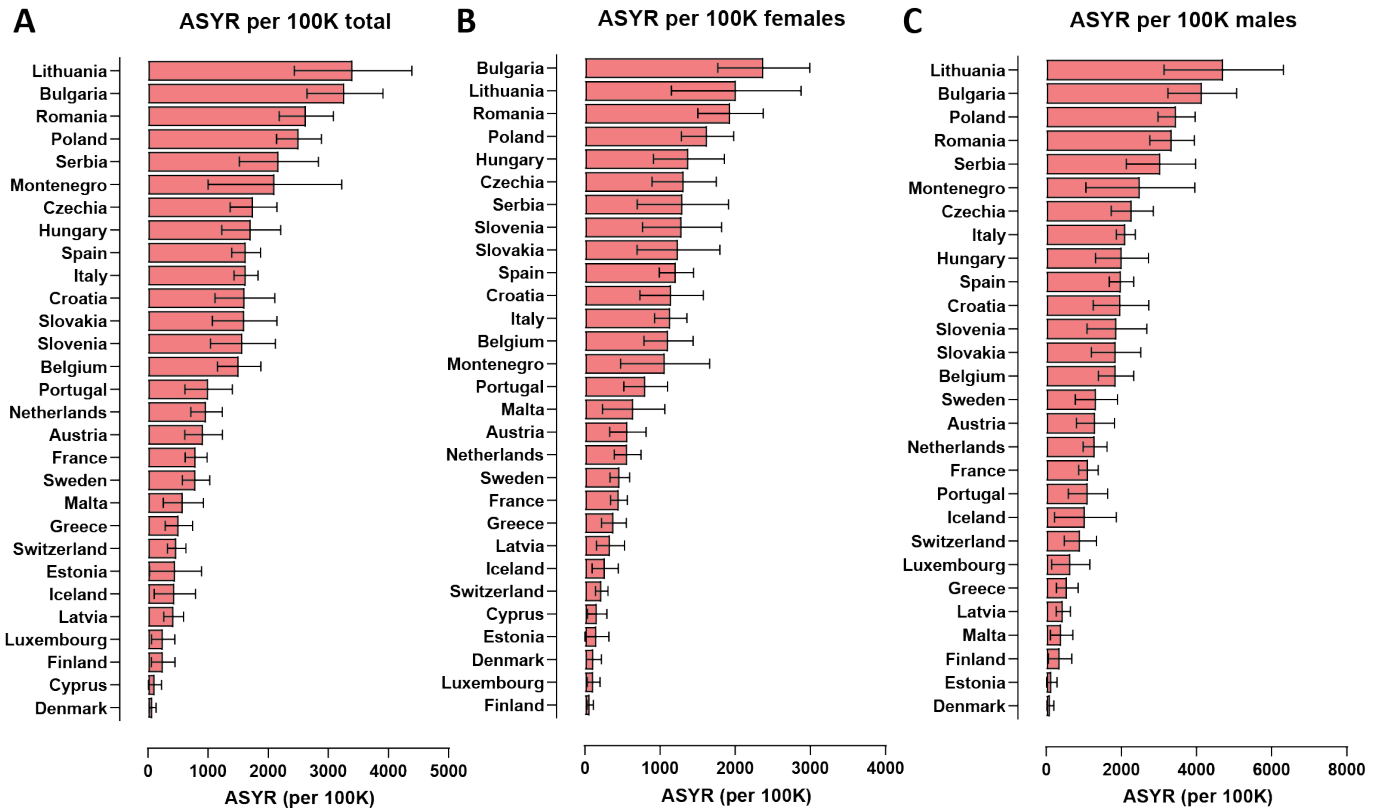

**Supplementary Figure 1: Excess mortality-based ASYR values for European countries in 2020.** Shown are the total (per 100K people) values. (A) ASYR values for the whole population; (B) ASYR values for females; (C) ASYR values for males.

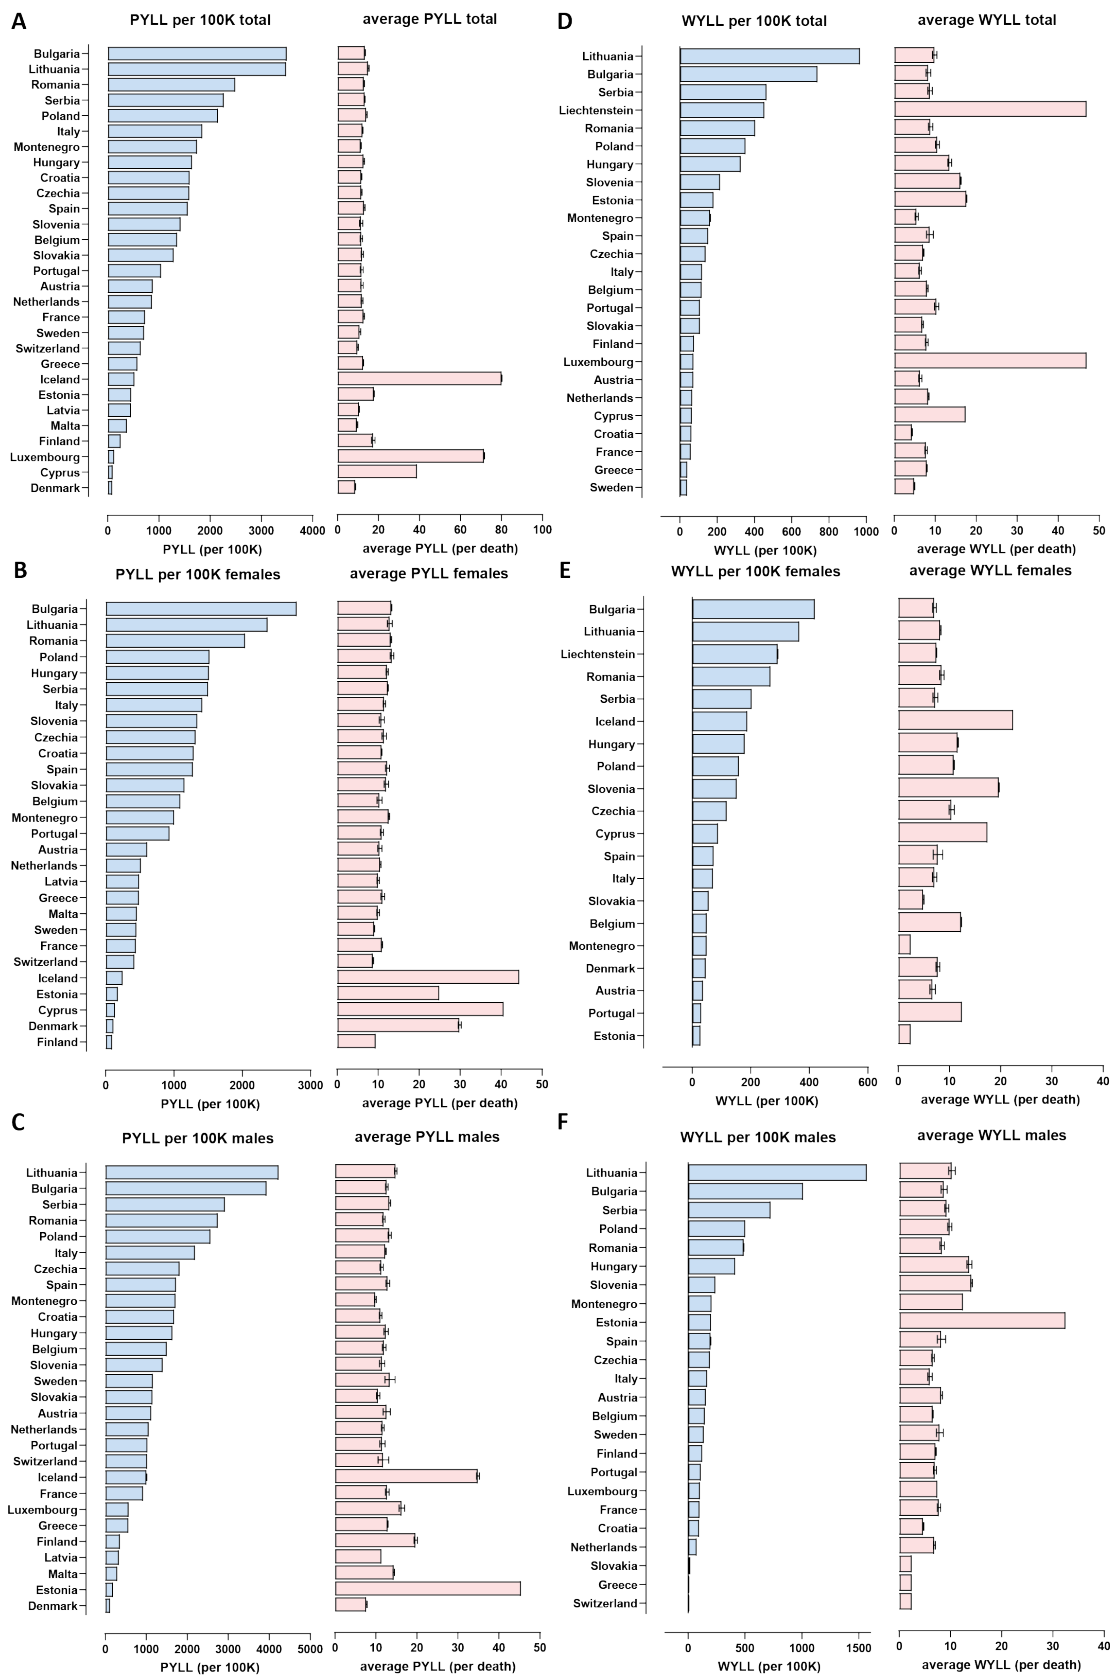

**Supplementary Figure 2: Excess mortality-based PYLLs and WYLL values for EU countries in 2020.** Shown are the total (per 100K people) and average (per death) values. (A) PYLL values for the whole population; (B) PYLL values for females; (C) PYLL values for males; (D) WYLL values for the whole population; (E) WYLL values for females; (F) WYLL values for males.

average PYLL males vs. females compressed

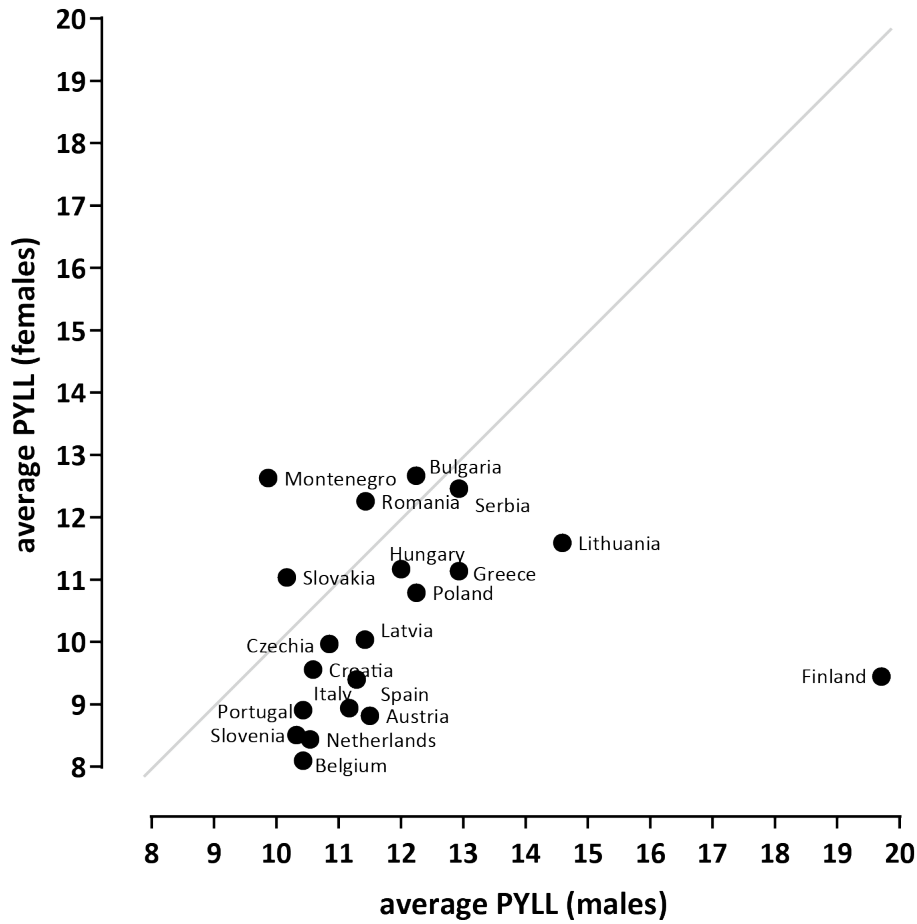

Supplementary Figure 3: Comparison between male- and female-specific average PYLL values in European countries. Shown are the average PYLL values per excess death.

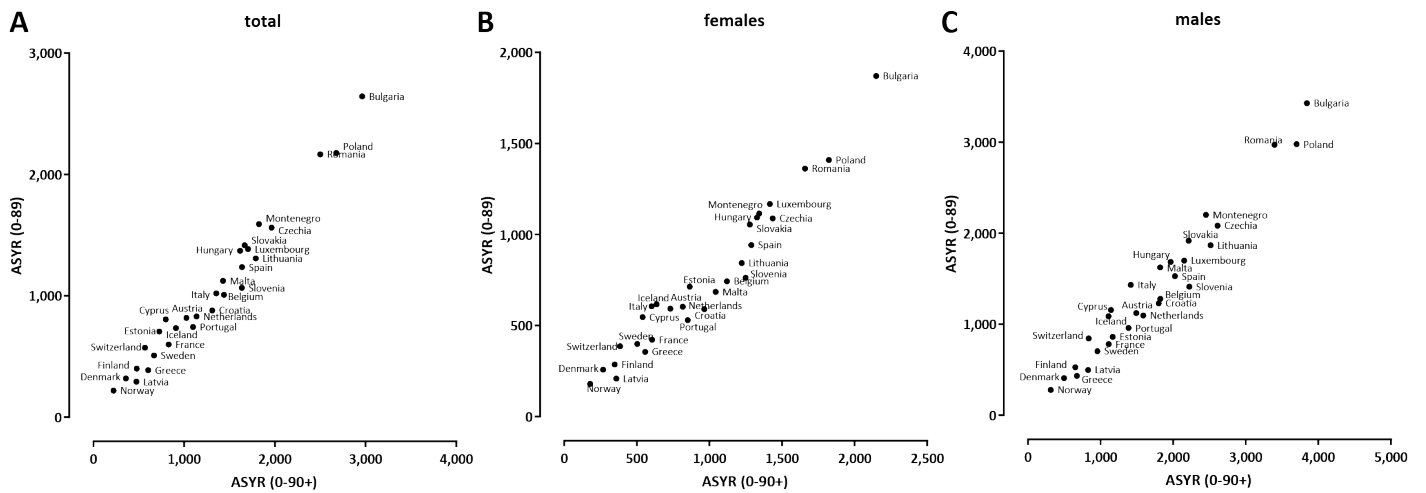

Supplementary Figure 4: ASYR values computed over the 0-89 age range and ASYR values computed over the whole population (with 90+ year-olds included) are consistent. (A) ASYR total; (B) ASYR females; (C) ASYR males.

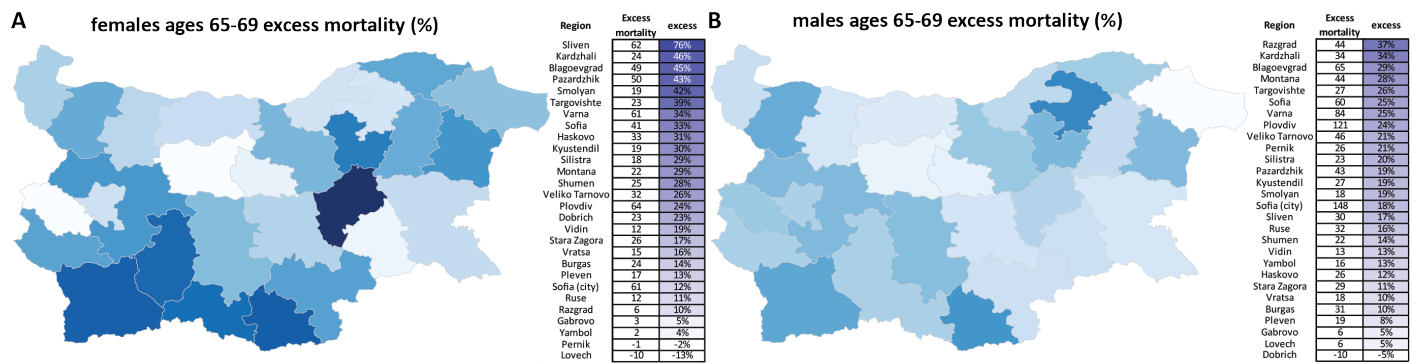

Supplementary Figure 5: Excess mortality in the 65-69 age range in Bulgarian regions. (A) females, P-scores; (B) males, P-scores.

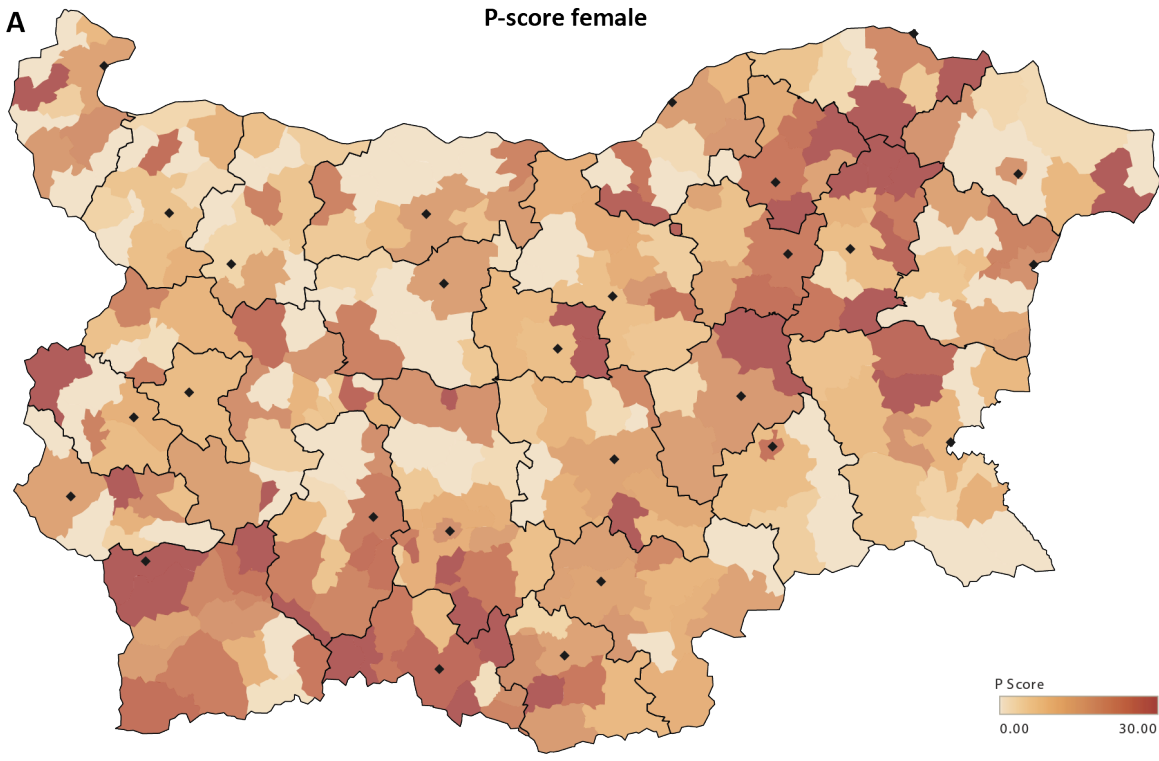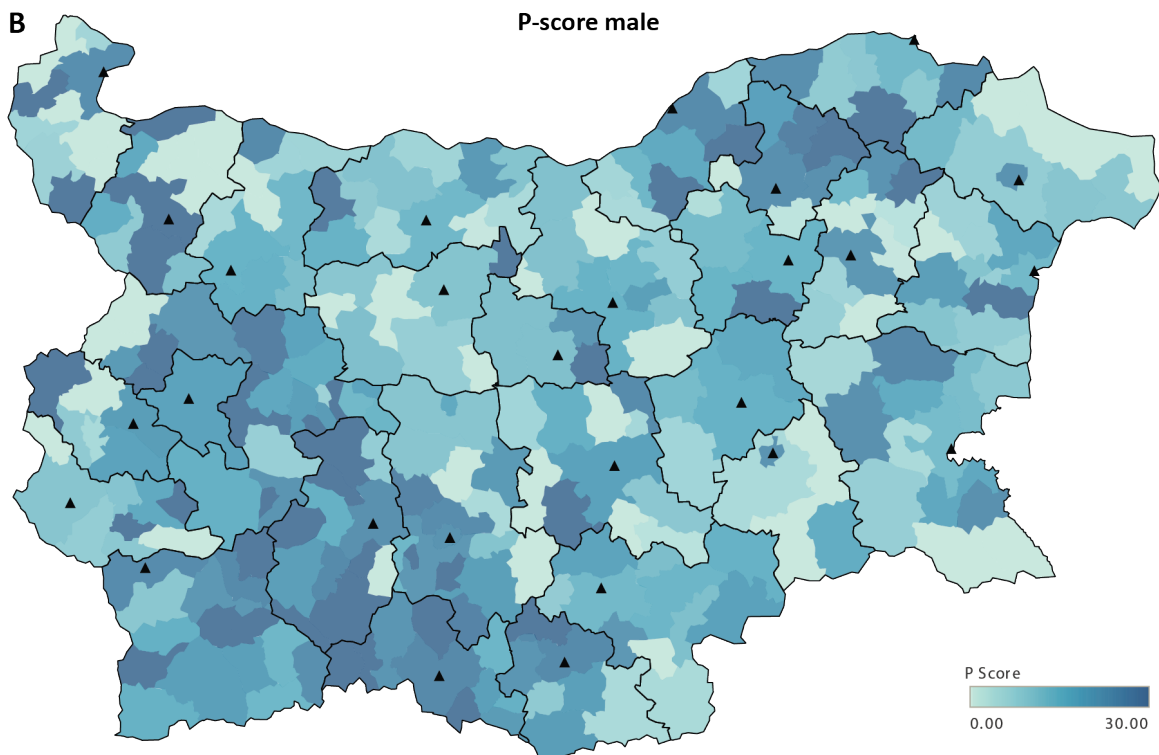

**Supplementary Figure 6: Regional disparities in the impacts of the COVID-19 pandemic in Bulgaria at the county/municipality level.** (A) Female excess mortality in Bulgaria at the county/municipality level; (B) Male excess mortality in Bulgaria at the county/municipality level; Regions are demarcated in black, regional centers are shown as black dots.

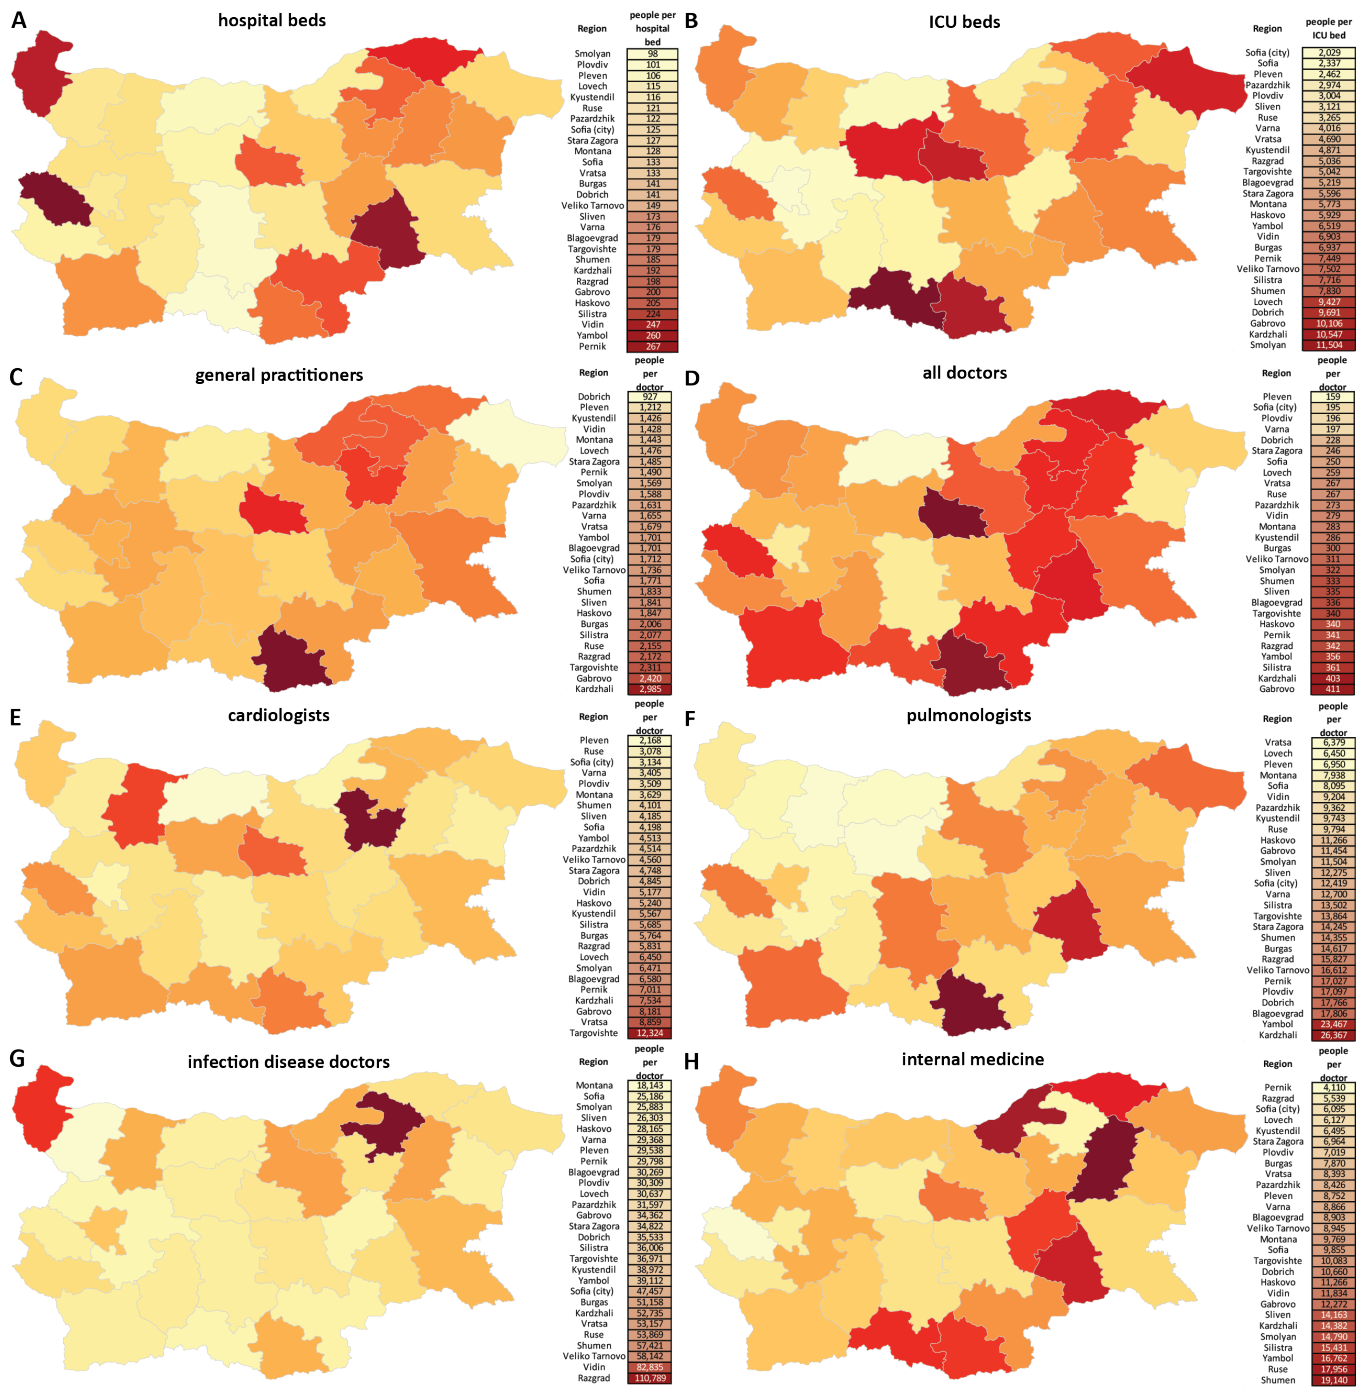

**Supplementary Figure 7: Availability of medical resources in Bulgarian regions.** (A) Overall hospital beds (in units of people per bed); (B) ICU beds; (C) Total doctors; (D) General practitioners; (E) Cardiologists; (F) Pulmonologists; (G) Infection disease specialists; (H) Internal medicine specialists. Data from the Bulgarian National Statistical Institute (<https://www.nsi.bg/bg>)

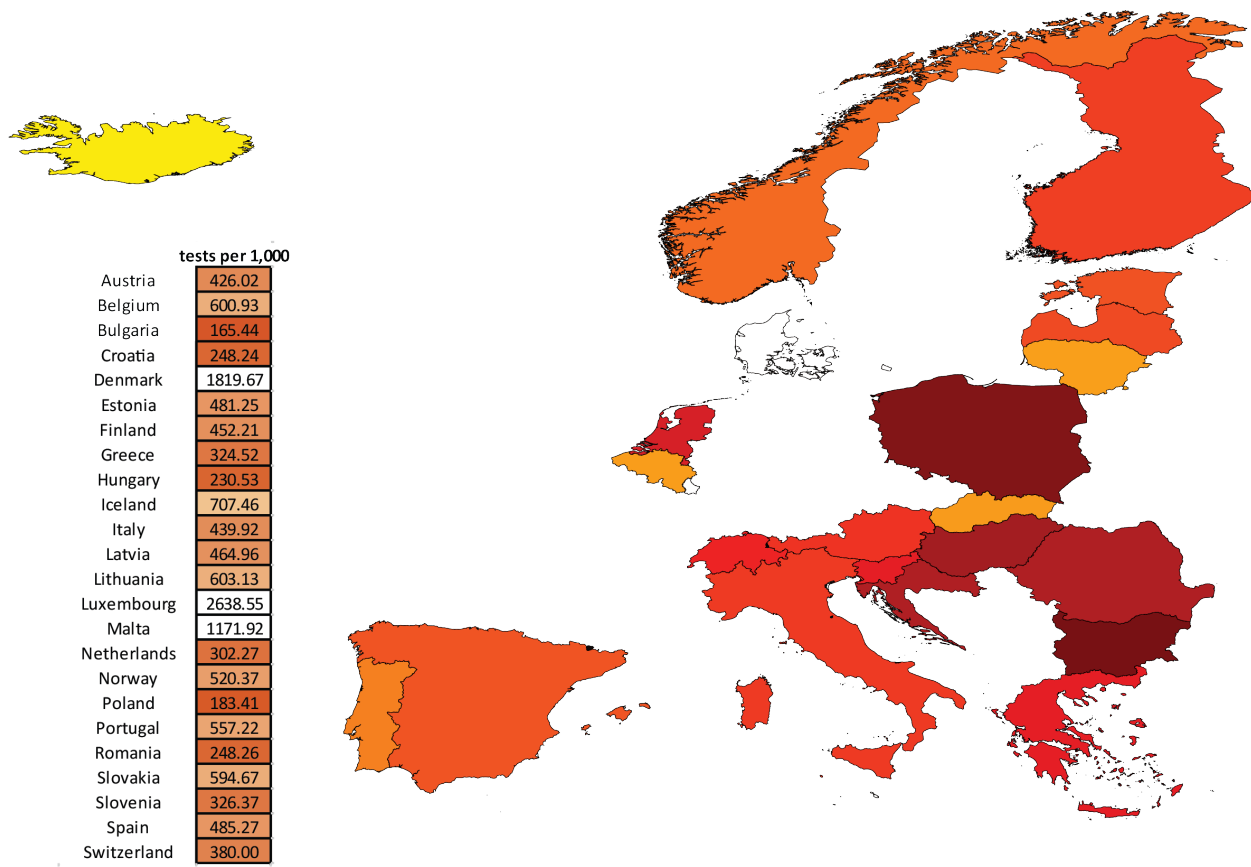

**Supplementary Figure 8: COVID testing in European countries.** Shown is the number of tests per 1,000 population for the period up to December 31st 2020. Data from <https://ourworldindata.org/coronavirus>

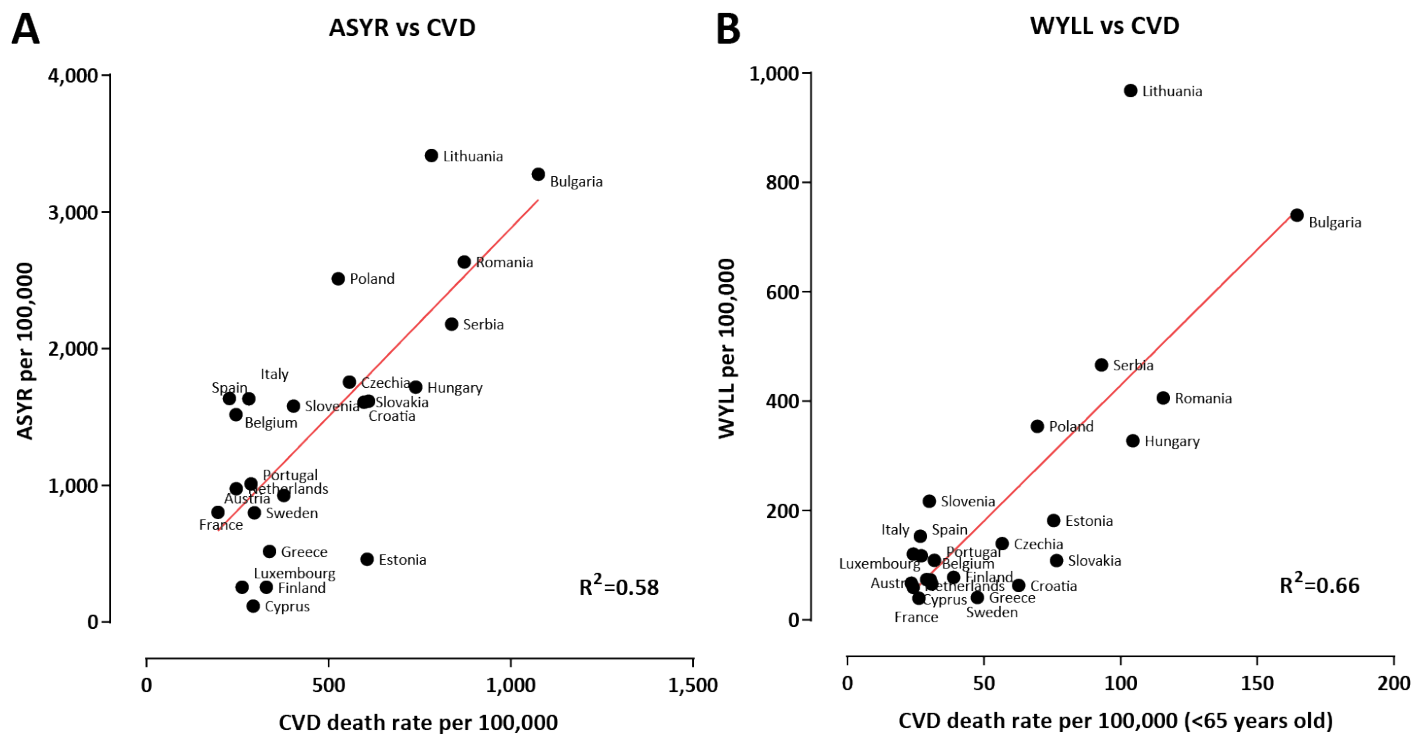

**C**

| Correlations*          | Pearson R2 | Pearson P-value | Spearman r | Spearman P-value |
|------------------------|------------|-----------------|------------|------------------|
| P-Score ~ CVD          | 0.14775    | 0.49085         | 0.0561     | 0.79458          |
| Excess Mortality ~ CVD | 0.52584    | 0.00831         | 0.34522    | 0.0985           |
| PYLL ~ CVD             | 0.60926    | 0.00158         | 0.43304    | 0.03454          |
| ASYR ~ CVD             | 0.58387    | 0.00274         | 0.42       | 0.04102          |
| WYLL ~ CVD<65          | 0.66024    | 0.00045         | 0.46522    | 0.02198          |

**Supplementary Figure 9: Correlation between death rates due to cardiovascular disease (CVD) and ASYR and WYLL values.** (A) CVD death rates per 100K population (based on Eurostat data from 2018) and ASYR values per 100K standardised population; (B) CVD death rates per 100K population (age < 65) and WYLL values per 100K working age population. (C) Correlation coefficients and *p*-values between CVD death rates and excess mortality metrics (*p*-score, EMR, PYLL, ASYR, WYLL). No adjustments were considered for the Spearman *p*-values in this multiple comparison because the years-of-life-lost metrics involved in three of the five hypothesis tested are closely related to each other (Spearman correlation between each pair of ASYR, WYLL and PYLL is > 0.69).
